# Supplementary material
Source: publisher figshare collection journal article supplement (https://acs.figshare.com/ndownloader/files/4664692)
Supplement: Supplementary file 1 [file 4664692]

A laboratory examination reveals how fluid-flow and dissolved oxygen flux interact to generate threshold conditions for controlling denitrification rates aquatic sediments.
